# Supplementary material for: Simultaneous Estimation of Two Coupled Hydrogen Bond Geometries from Pairs of Entangled NMR Parameters: The Test Case of 4-Hydroxypyridine Anion
Source: MDPI journal article supplement (doi:10.3390/molecules27123923), 2022-06-18

**Simultaneous estimation of two coupled hydrogen bond geometries from pairs of entangled NMR parameters: the test case of 4-hydroxypyridine anion**

Elena Yu. Tupikina,<sup>\*,1</sup> Mark Sigalov,<sup>2</sup> Peter M. Tolstoy<sup>1</sup>

<sup>1</sup> Institute of Chemistry, St. Petersburg State University, St. Petersburg, Russia

<sup>2</sup> Department of Chemistry, Ben-Gurion University of the Negev, Beer-Sheva, Israel

Table of contents

|                  |                                                                                                                                                                                                                                                                                                                                                                                    |    |
|------------------|------------------------------------------------------------------------------------------------------------------------------------------------------------------------------------------------------------------------------------------------------------------------------------------------------------------------------------------------------------------------------------|----|
| <b>Table S1</b>  | Geometric parameters of OHO and OHN hydrogen bonds                                                                                                                                                                                                                                                                                                                                 | 2  |
| <b>Table S2</b>  | Coefficients $a$ , $b_1$ , $c_1$ , $d_1$ , $b_2$ , $c_2$ and $d_2$ for each discussed spectral parameter, $R^2$ for each approximation                                                                                                                                                                                                                                             | 4  |
| <b>Figure S1</b> | $\Delta\delta_{C35}$ for complexes of hydroxypyridine anion with a single substituted methanol molecule from an oxygen side (OHO hydrogen bond) $\Delta\delta_{C35a}$ and from a nitrogen site (OHN hydrogen bond) $\Delta\delta_{C35b}$ . Distributions of the sum $\Delta\delta_{C35\_Σ} = \Delta\delta_{C35a} + \Delta\delta_{C25b}$ along $q_{1a}$ and $q_{1b}$ hydrogen bonds | 5  |
| <b>Figure S2</b> | $\Delta\delta_{C26}$ for complexes of hydroxypyridine with a single substituted methanol molecule from an oxygen side (OHO hydrogen bond) $\Delta\delta_{C26a}$ and from a nitrogen site (OHN hydrogen bond) $\Delta\delta_{C26b}$ . Distributions of the sum $\Delta\delta_{C26\_Σ} = \Delta\delta_{C26a} + \Delta\delta_{C26b}$ along $q_{1a}$ and $q_{1b}$ hydrogen bonds       | 6  |
| <b>Figure S3</b> | $\Delta\delta_{C26} - \Delta\delta_{C26\_Σ}$ , $\Delta\delta_{C35} - \Delta\delta_{C35\_Σ}$ along $q_{1a}$ and $q_{1b}$                                                                                                                                                                                                                                                            | 7  |
| <b>Figure S4</b> | Solution of the inverse spectral problem for $R_1=H$ , $R_2=F$ , $R_3=CH_3$ , $R_4=H$ , $R_5=F$ , $R_6=CF_3$                                                                                                                                                                                                                                                                       | 8  |
| <b>Figure S5</b> | Solution of the inverse spectral problem for $R_1=H$ , $R_2=F$ , $R_3=CF_3$ , $R_4=H$ , $R_5=F$ , $R_6=CF_3$                                                                                                                                                                                                                                                                       | 9  |
| <b>Figure S6</b> | Solution of the inverse spectral problem for $R_1=H$ , $R_2=F$ , $R_3=CF_3$ , $R_4=H$ , $R_5=F$ , $R_6=CH_3$                                                                                                                                                                                                                                                                       | 10 |
| <b>Figure S7</b> | Optimized geometry of complex <b>3</b> with $CF_3CFOH$ and $CH_3CFHOH$ as hydrogen bond donors.                                                                                                                                                                                                                                                                                    | 11 |

**Table S1.** Geometric parameters of OHO and OHN hydrogen bonds.

| $R_1$           | $R_2$           | $R_3$           | $R_4$           | $R_5$           | $R_6$           | $r_1, \text{\AA}$ | $r_2, \text{\AA}$ | $r_3, \text{\AA}$ | $r_4, \text{\AA}$ | $\angle\text{OHO}, ^\circ$ | $\angle\text{NHO}, ^\circ$ |
|-----------------|-----------------|-----------------|-----------------|-----------------|-----------------|-------------------|-------------------|-------------------|-------------------|----------------------------|----------------------------|
| H               | H               | H               | H               | H               | H               | 1.00              | 1.67              | 1.74              | 1.00              | 169                        | 171                        |
| H               | H               | CN              | H               | H               | H               | 1.02              | 1.56              | 1.76              | 1.00              | 167                        | 171                        |
| H               | CN              | CN              | H               | H               | H               | 1.06              | 1.44              | 1.78              | 1.00              | 169                        | 171                        |
| CN              | CN              | CN              | H               | H               | H               | 1.49              | 1.04              | 1.81              | 0.99              | 178                        | 169                        |
| H               | H               | H               | CN              | H               | H               | 1.00              | 1.68              | 1.61              | 1.03              | 168                        | 168                        |
| H               | H               | CN              | CN              | H               | H               | 1.02              | 1.59              | 1.64              | 1.02              | 166                        | 168                        |
| H               | CN              | CN              | CN              | H               | H               | 1.05              | 1.46              | 1.66              | 1.01              | 168                        | 168                        |
| CN              | CN              | CN              | CN              | H               | H               | 1.47              | 1.04              | 1.70              | 1.01              | 177                        | 166                        |
| H               | H               | H               | CN              | CN              | H               | 1.00              | 1.70              | 1.48              | 1.07              | 168                        | 170                        |
| H               | H               | CN              | CN              | CN              | H               | 1.01              | 1.59              | 1.51              | 1.06              | 167                        | 170                        |
| H               | CN              | CN              | CN              | CN              | H               | 1.04              | 1.48              | 1.55              | 1.04              | 167                        | 168                        |
| CN              | CN              | CN              | CN              | CN              | H               | 1.44              | 1.05              | 1.61              | 1.03              | 176                        | 167                        |
| H               | H               | H               | CN              | CN              | CN              | 0.99              | 1.74              | 1.07              | 1.54              | 167                        | 174                        |
| H               | H               | CN              | CN              | CN              | CN              | 1.00              | 1.64              | 1.09              | 1.49              | 165                        | 178                        |
| H               | CN              | CN              | CN              | CN              | CN              | 1.02              | 1.53              | 1.09              | 1.50              | 167                        | 172                        |
| CN              | CN              | CN              | CN              | CN              | CN              | 1.09              | 1.37              | 1.11              | 1.45              | 171                        | 178                        |
| H               | H               | NO <sub>2</sub> | H               | H               | H               | 1.04              | 1.50              | 1.76              | 1.00              | 168                        | 171                        |
| H               | NO <sub>2</sub> | NO <sub>2</sub> | H               | H               | H               | 1.52              | 1.02              | 1.81              | 0.99              | 178                        | 169                        |
| NO <sub>2</sub> | NO <sub>2</sub> | NO <sub>2</sub> | H               | H               | H               | 1.68              | 0.99              | 1.82              | 0.99              | 176                        | 168                        |
| H               | H               | H               | NO <sub>2</sub> | H               | H               | 1.00              | 1.68              | 1.54              | 1.05              | 168                        | 171                        |
| H               | H               | NO <sub>2</sub> | NO <sub>2</sub> | H               | H               | 1.03              | 1.52              | 1.57              | 1.04              | 168                        | 171                        |
| H               | NO <sub>2</sub> | NO <sub>2</sub> | NO <sub>2</sub> | H               | H               | 1.51              | 1.03              | 1.64              | 1.02              | 177                        | 170                        |
| NO <sub>2</sub> | NO <sub>2</sub> | NO <sub>2</sub> | NO <sub>2</sub> | H               | H               | 1.68              | 1.00              | 1.65              | 1.01              | 176                        | 170                        |
| H               | H               | H               | NO <sub>2</sub> | NO <sub>2</sub> | H               | 0.99              | 1.73              | 1.05              | 1.66              | 167                        | 166                        |
| H               | H               | NO <sub>2</sub> | NO <sub>2</sub> | NO <sub>2</sub> | H               | 1.02              | 1.54              | 1.05              | 1.64              | 171                        | 167                        |
| H               | NO <sub>2</sub> | NO <sub>2</sub> | NO <sub>2</sub> | NO <sub>2</sub> | H               | 1.39              | 1.07              | 1.07              | 1.55              | 179                        | 169                        |
| NO <sub>2</sub> | H               | 1.65              | 1.00              | 1.45              | 1.08              | 176                        | 175                        |
| H               | H               | H               | NO <sub>2</sub> | NO <sub>2</sub> | NO <sub>2</sub> | 0.99              | 1.75              | 1.03              | 1.77              | 166                        | 156                        |
| H               | H               | NO <sub>2</sub> | NO <sub>2</sub> | NO <sub>2</sub> | NO <sub>2</sub> | 1.01              | 1.57              | 1.04              | 1.73              | 171                        | 162                        |
| H               | NO <sub>2</sub> | 1.08              | 1.38              | 1.04              | 1.68              | 177                        | 164                        |
| NO <sub>2</sub> | 1.60              | 1.01              | 1.06              | 1.62              | 167                        | 165                        |
| H               | OMe             | OMe             | H               | OMe             | OMe             | 1.02              | 1.55              | 1.62              | 1.02              | 171                        | 174                        |
| H               | OMe             | OMe             | H               | H               | OMe             | 1.03              | 1.53              | 1.74              | 1.00              | 172                        | 168                        |
| H               | OMe             | OMe             | H               | H               | H               | 1.03              | 1.52              | 1.76              | 1.00              | 172                        | 171                        |
| H               | OMe             | OMe             | OMe             | OMe             | OMe             | 1.03              | 1.52              | 1.65              | 1.02              | 172                        | 176                        |
| H               | H               | OMe             | H               | OMe             | OMe             | 1.00              | 1.69              | 1.68              | 1.02              | 162                        | 163                        |
| H               | H               | OMe             | H               | H               | H               | 1.01              | 1.63              | 1.74              | 1.00              | 170                        | 168                        |
| H               | H               | OMe             | H               | H               | H               | 1.01              | 1.60              | 1.75              | 1.00              | 168                        | 171                        |
| H               | H               | OMe             | OMe             | OMe             | OMe             | 1.00              | 1.66              | 1.13              | 1.40              | 167                        | 175                        |
| H               | H               | H               | H               | H               | OMe             | 1.00              | 1.68              | 1.61              | 1.03              | 168                        | 174                        |
| H               | H               | H               | H               | H               | OMe             | 1.00              | 1.67              | 1.65              | 1.02              | 169                        | 172                        |
| H               | H               | H               | OMe             | OMe             | OMe             | 0.99              | 1.71              | 1.13              | 1.41              | 167                        | 175                        |
| OMe             | OMe             | OMe             | H               | H               | OMe             | 1.05              | 1.48              | 1.74              | 1.00              | 170                        | 168                        |
| OMe             | OMe             | OMe             | OMe             | OMe             | OMe             | 1.03              | 1.53              | 1.13              | 1.40              | 170                        | 178                        |

|     |     |     |   |     |     |      |      |      |      |     |     |
|-----|-----|-----|---|-----|-----|------|------|------|------|-----|-----|
| OMe | OMe | OMe | H | OMe | OMe | 1.04 | 1.49 | 1.62 | 1.02 | 156 | 172 |
| OMe | OMe | OMe | H | H   | H   | 1.05 | 1.46 | 1.75 | 1.00 | 170 | 171 |
| H   | F   | F   | H | H   | H   | 1.41 | 1.07 | 1.80 | 0.99 | 179 | 169 |
| H   | F   | F   | H | H   | F   | 1.08 | 1.38 | 1.64 | 1.02 | 177 | 171 |
| H   | F   | F   | H | H   | F   | 1.06 | 1.42 | 1.51 | 1.06 | 176 | 176 |
| H   | F   | F   | F | F   | F   | 1.03 | 1.49 | 1.07 | 1.54 | 175 | 176 |
| H   | H   | F   | H | H   | H   | 1.03 | 1.54 | 1.75 | 1.00 | 171 | 171 |
| H   | H   | F   | H | H   | F   | 1.02 | 1.55 | 1.62 | 1.02 | 171 | 171 |
| H   | H   | F   | H | F   | F   | 1.02 | 1.57 | 1.47 | 1.08 | 171 | 177 |
| H   | H   | F   | F | F   | F   | 1.01 | 1.62 | 1.07 | 1.56 | 170 | 175 |
| F   | F   | F   | H | H   | H   | 1.53 | 1.02 | 1.80 | 0.99 | 175 | 169 |
| F   | F   | F   | H | H   | F   | 1.52 | 1.02 | 1.68 | 1.01 | 175 | 169 |
| F   | F   | F   | H | F   | F   | 1.50 | 1.03 | 1.58 | 1.03 | 175 | 174 |
| F   | F   | F   | F | F   | F   | 1.43 | 1.05 | 1.09 | 1.47 | 176 | 176 |
| H   | H   | H   | H | H   | F   | 1.00 | 1.67 | 1.60 | 1.03 | 168 | 172 |
| H   | H   | H   | H | F   | F   | 1.00 | 1.69 | 1.41 | 1.11 | 168 | 177 |
| H   | H   | H   | F | F   | F   | 0.99 | 1.73 | 1.06 | 1.58 | 167 | 175 |

**Table S2.** Approximation coefficients for  $\Delta f(q_{1a}, q_{1b}) = a + b_1 q_{1a} + c_1 q_{1a}^2 + d_1 q_{1a}^3 + b_2 q_{1b} + c_2 q_{1b}^2 + d_2 q_{1b}^3$  (for  $q_{1a}$  and  $q_{1b}$  in Å,  $\Delta f$  in ppm) and  $R^2$ .

| $\Delta f$              | $a$   | $b_1$  | $c_1$  | $d_1$  | $b_2$  | $c_2$  | $d_2$  | $R^2$ |
|-------------------------|-------|--------|--------|--------|--------|--------|--------|-------|
| $\Delta\delta_{C1}$     | -1.1  | -15.35 | -9.15  | 30.84  | 2.18   | -2.33  | 9.91   | 0.97  |
| $\Delta\delta_{N4}$     | -49.4 | 41.45  | 4.37   | -8.12  | -106.3 | 14.95  | -133.9 | 0.99  |
| $\Delta\delta_{H1\_HB}$ | 17.0  | 4.12   | -87.91 | -90.03 | 0.21   | -6.23  | -16.56 | 0.93  |
| $\Delta\delta_{H2\_HB}$ | 17.9  | 1.38   | -2.96  | -33.24 | 5.13   | -79.22 | -85.15 | 0.95  |
| $\Delta\delta_{C26}$    | -3.0  | -4.03  | 0.81   | -9.606 | -2.07  | 0.67   | 24.56  | 0.82  |
| $\Delta\delta_{C35}$    | -8.1  | 1.10   | -1.37  | 23.99  | -16.86 | 13.97  | 30.38  | 0.98  |
| $\Delta\delta_{H35}$    | 0.4   | 0.84   | -0.65  | -0.37  | 0.35   | 1.12   | 0.49   | 0.86  |

**Figure S1.** Distribution of the chemical shift change upon complexation  $\Delta\delta_{C35}$  for complexes of hydroxypyridine with a single substituted methanol molecule (a) from the oxygen side (OHO hydrogen bond)  $\Delta\delta_{C35a}$ , (b) from the nitrogen site (OHN hydrogen bond)  $\Delta\delta_{C35b}$ . (c) Distributions of the sum of the changes upon formation of both OHO and OHN hydrogen bonds  $\Delta\delta_{C35\_Σ} = \Delta\delta_{C35a} + \Delta\delta_{C35b}$  along  $q_1$  coordinates for OHO ( $q_{1a}$ ) and OHN ( $q_{1b}$ ) hydrogen bonds. Coefficients  $a_1, b_1, c_1, d_1, a_2, b_2, c_2$  are given near each plot. Isolines drawn with a step of 0.5 ppm.

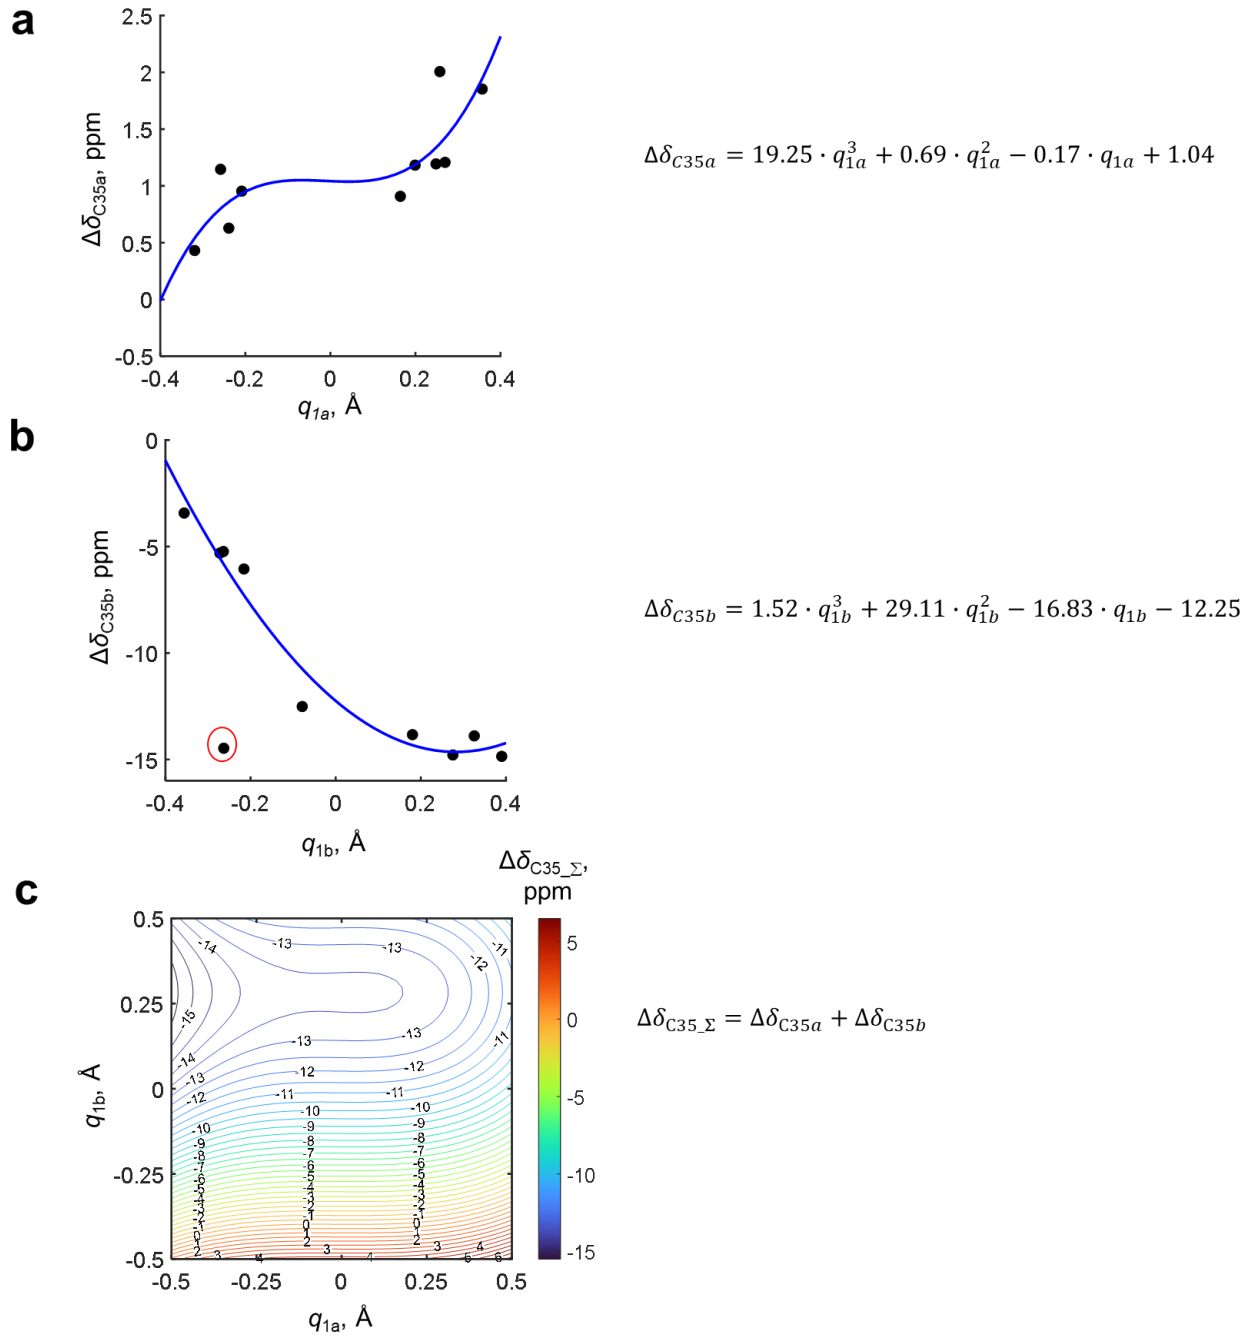

**Figure S2.** Distribution of the chemical shift change upon complexation  $\Delta\delta_{C26}$  for complexes of hydroxypyridine with a single substituted methanol molecule (a) from the oxygen side (OHO hydrogen bond)  $\Delta\delta_{C26a}$ , (b) from the nitrogen site (OHN hydrogen bond)  $\Delta\delta_{C26b}$ . (c) Distributions of the sum of the changes upon formation of both OHO and OHN hydrogen bonds  $\Delta\delta_{C26\_Σ} = \Delta\delta_{C26a} + \Delta\delta_{C26b}$  along  $q_1$  coordinates for OHO ( $q_{1a}$ ) and OHN ( $q_{1b}$ ) hydrogen bonds. Coefficients  $a_1, b_1, c_1, d_1, a_2, b_2, c_2$  are given near each plot. Isolines drawn with a step of 0.5 ppm.

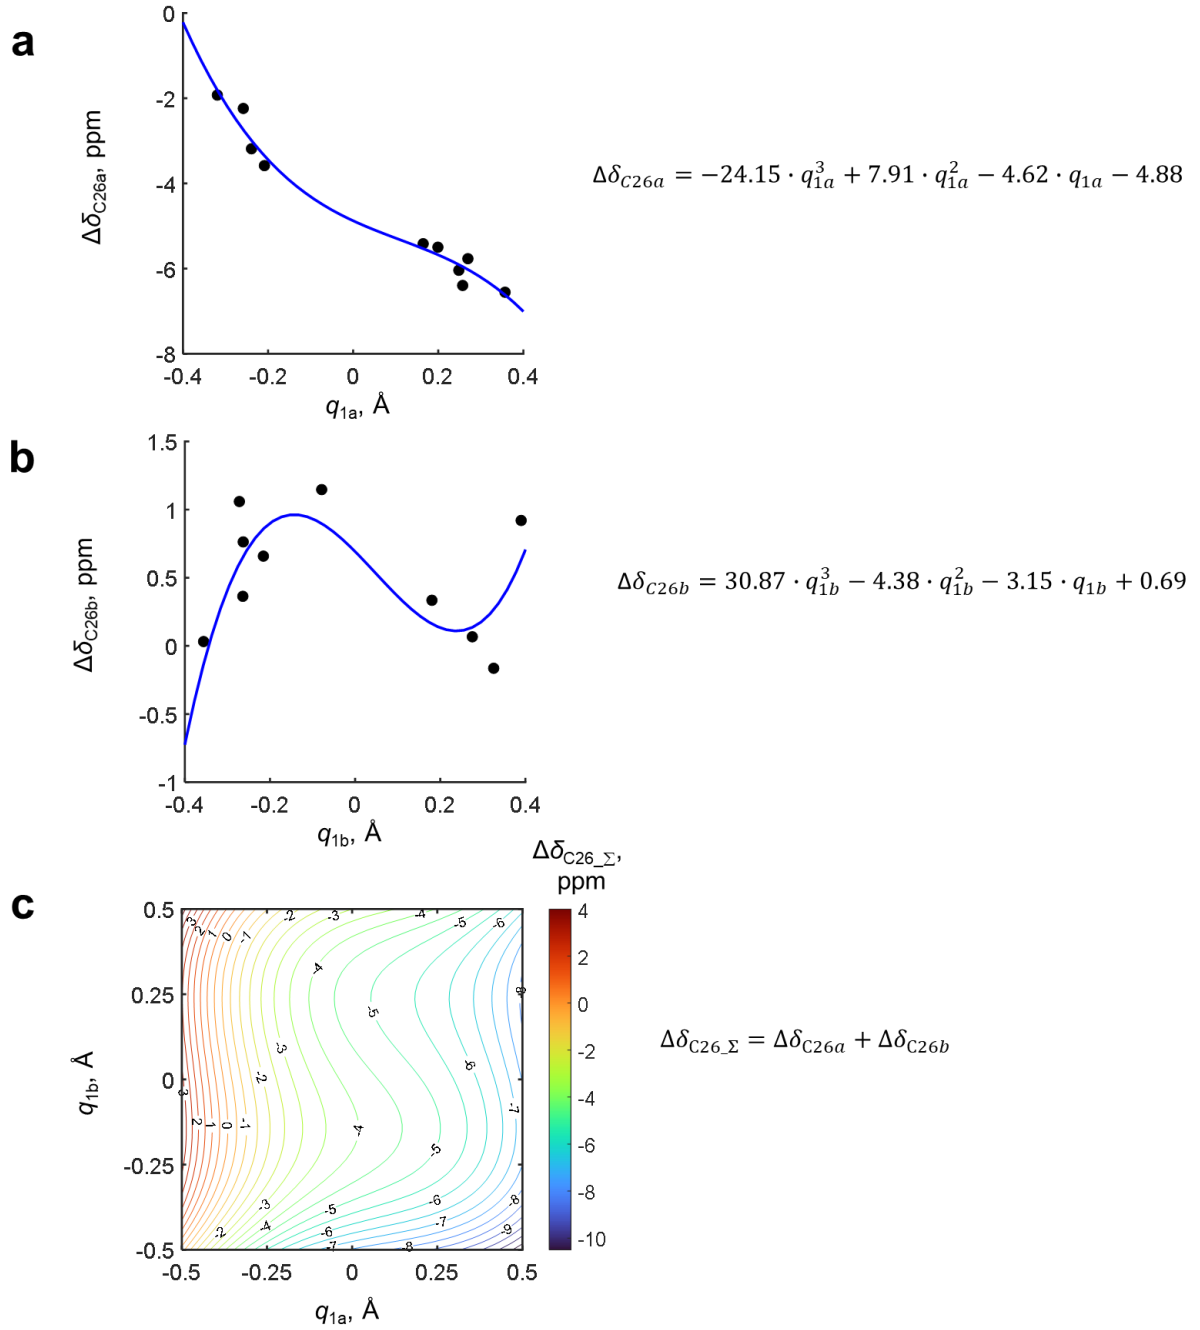

### Non-additivity (cooperativity) of hydrogen bonds formed by hydroxypyridone anion

**Figure S3.** Difference (a) between carbon chemical shift changes upon formation of two hydrogen bond simultaneously  $\Delta\delta_{C26}$  and of the sum of a change upon formation of OHO and OHN hydrogen bonds  $\Delta\delta_{C26\_Σ} = \Delta\delta_{C26a} + \Delta\delta_{C26b}$ , (b) between carbon chemical shift changes upon formation of two hydrogen bond simultaneously  $\Delta\delta_{C35}$  and of the sum of a change upon formation of OHO and OHN hydrogen bonds  $\Delta\delta_{C35\_Σ} = \Delta\delta_{C35a} + \Delta\delta_{C35b}$  along  $q_1$  coordinates for OHO ( $q_{1a}$ ) and OHN ( $q_{1b}$ ) hydrogen bonds. Isolines drawn with a step of 0.2 ppm, and 0.5 ppm respectively.

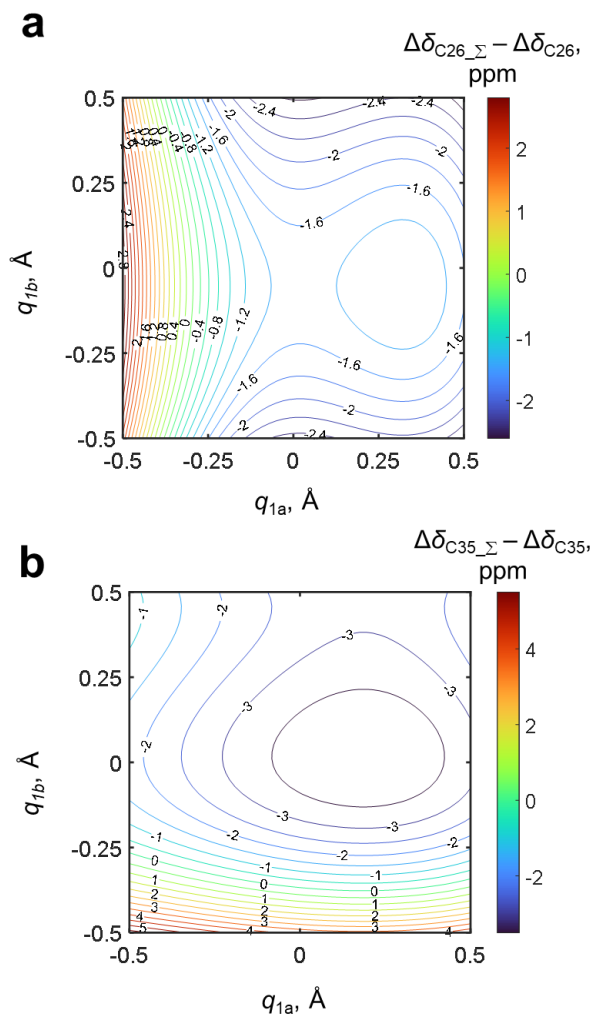

**Figure S4.** Solution of inverse spectral problem for  $R_1=\text{H}$ ,  $R_2=\text{F}$ ,  $R_3=\text{CH}_3$ ,  $R_4=\text{H}$ ,  $R_5=\text{F}$ ,  $R_6=\text{CF}_3$  based on a following pairs of spectral parameters (a)  $\Delta\delta_{\text{C}1}$  and  $\Delta\delta_{\text{N}4}$ , (b)  $\Delta\delta_{\text{C}26}$  and  $\Delta\delta_{\text{C}35}$ , (c)  $\Delta\delta_{\text{C}35}$  and  $\Delta\delta_{\text{H}35}$ . Green dots correspond to predicted values of  $q_{1a}$  and  $q_{1b}$ , black dots correspond to calculated ones.

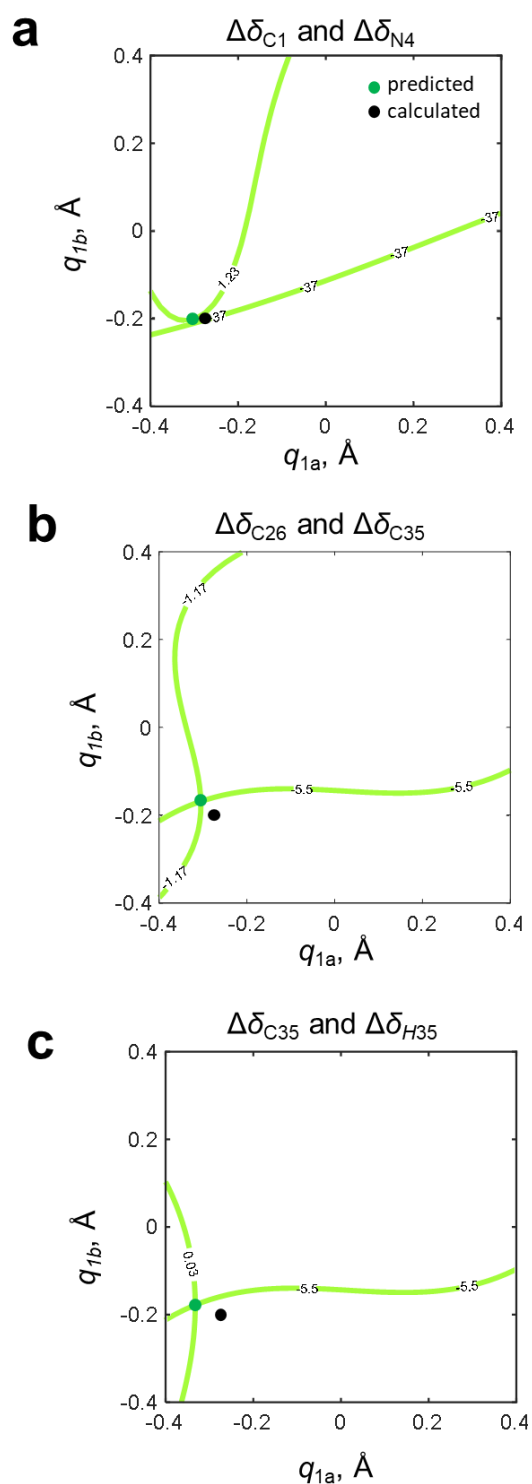



**Figure S5.** Solution of inverse spectral problem for  $R_1=\text{H}$ ,  $R_2=\text{F}$ ,  $R_3=\text{CF}_3$ ,  $R_4=\text{H}$ ,  $R_5=\text{F}$ ,  $R_6=\text{CF}_3$  based on a following pairs of spectral parameters (a)  $\Delta\delta_{\text{C1}}$  and  $\Delta\delta_{\text{N4}}$ , (b)  $\Delta\delta_{\text{C26}}$  and  $\Delta\delta_{\text{C35}}$ , (c)  $\Delta\delta_{\text{C35}}$  and  $\Delta\delta_{\text{H35}}$ . Green dots correspond to predicted values of  $q_{1a}$  and  $q_{1b}$ , black dots correspond to calculated ones.

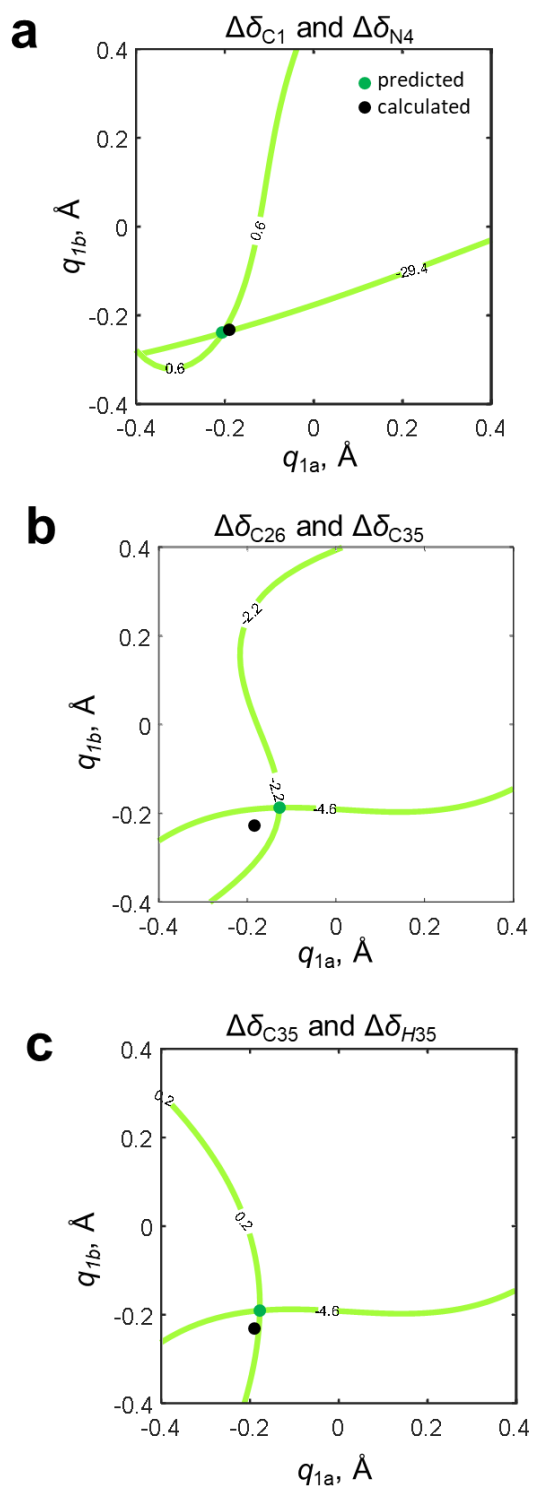

**Figure S6.** Solution of inverse spectral problem for  $R_1=\text{H}$ ,  $R_2=\text{F}$ ,  $R_3=\text{CF}_3$ ,  $R_4=\text{H}$ ,  $R_5=\text{F}$ ,  $R_6=\text{CH}_3$  based on a following pairs of spectral parameters (a)  $\Delta\delta_{\text{C1}}$  and  $\Delta\delta_{\text{N4}}$ , (b)  $\Delta\delta_{\text{C26}}$  and  $\Delta\delta_{\text{C35}}$ , (c)  $\Delta\delta_{\text{C35}}$  and  $\Delta\delta_{\text{H35}}$ . Green dots correspond to predicted values of  $q_{1a}$  and  $q_{1b}$ , black dots correspond to calculated ones.

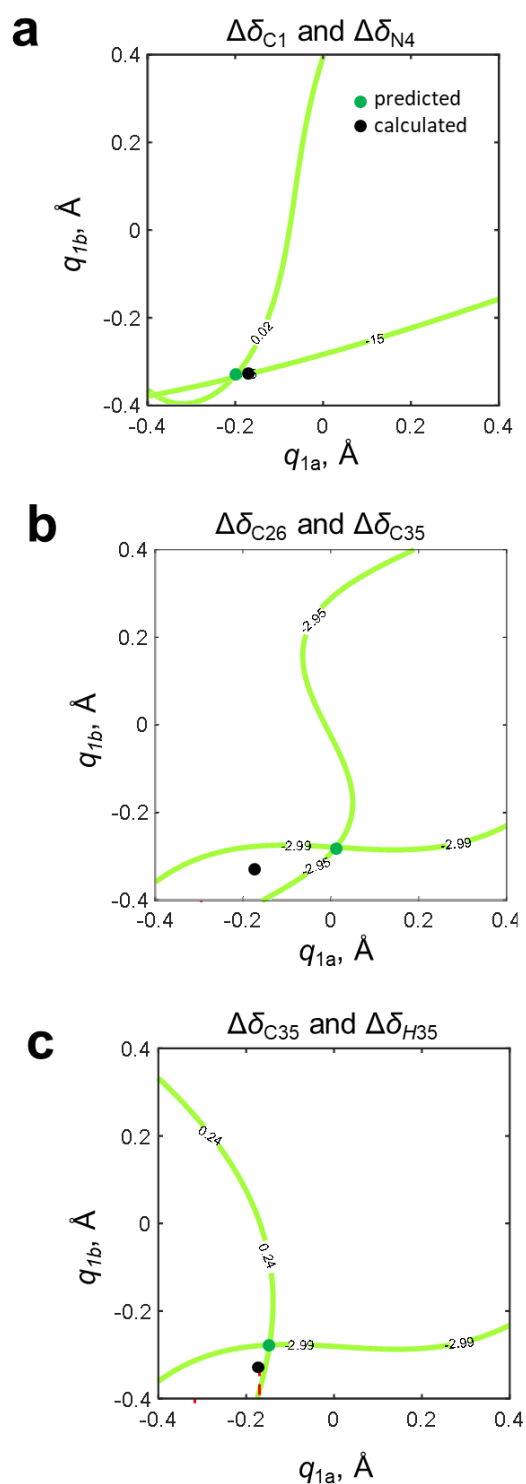

**Figure S7.** Optimized geometry of complex **3** with CF<sub>3</sub>CFOH and CH<sub>3</sub>CFHOH as hydrogen bond donors.

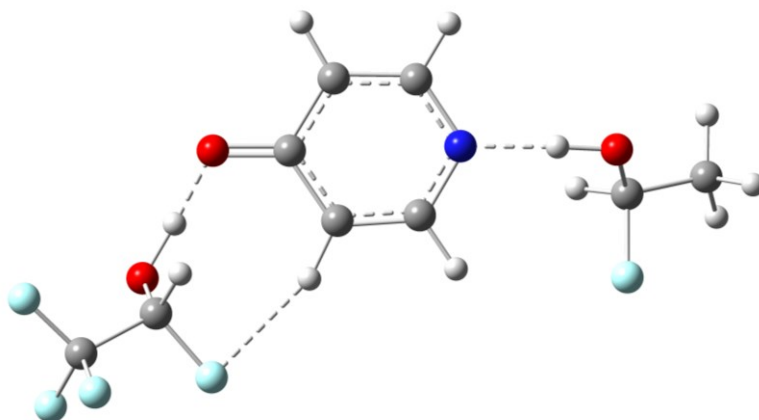

Supplement: s1 [file s1]
